# Supplementary material for: C–N–S tridoping into TiO2matrix for photocatalytic applications: observations, speculations and contradictions in the codoping process
Source: Royal Society of Chemistry journal article supplement (doi:10.1039/c7qi00189d), 2017-01-01
Supplement: c7qi00189d1.pdf [file c7qi00189d1.pdf]

**C-N-S tridoping into TiO<sub>2</sub> matrix for photocatalytic applications: Observations,  
speculations and contradictions in the codoping process†**

C. Sushma, S. Girish Kumar\*

Department of Chemistry, School of Engineering and Technology, CMR University, Bangalore-  
562149, KARNATAKA, INDIA, E-mail: [girichem@yahoo.co.in](mailto:girichem@yahoo.co.in)

**SUPPLEMENTARY MATERIALS**

**Table S1** Comparison of Phase Transformation Pathways between TiO<sub>2</sub> and C-N-S-TiO<sub>2</sub> with different dopant precursors.

| Preparation Methods                  | TiO <sub>2</sub> | C-N-S-TiO <sub>2</sub>                | Dopant Precursor | Ref. |
|--------------------------------------|------------------|---------------------------------------|------------------|------|
| Fluoride-induced self-transformation | A                | A                                     | Cysteine         | [18] |
| Hydrothermal                         | A-R              | A                                     | Cysteine         | [24] |
| Sol-gel                              | A                | A                                     | Cysteine         | [31] |
| Sol-gel & ball-milling               | A-R              | A                                     | Thiourea         | [16] |
| Hydrothermal                         | A                | A                                     | Thiourea         | [17] |
| Modified Sol-gel                     | A                | A                                     | Thiourea         | [19] |
| Sol-gel                              | A-R              | A                                     | Thiourea         | [20] |
| Sol-gel                              | A-R              | A                                     | Thiourea         | [22] |
| Surfactant assisted Sol-gel          | A                | A-R                                   | Thiourea         | [25] |
| Sol-gel                              | A-B              | A-B with no change in phase content   | Thiourea         | [26] |
| Sol-gel                              | A-B-R            | A-B-R with increased A content        | Thiourea         | [27] |
| Sol-gel                              | A                | A                                     | Thiourea         | [29] |
| Simple Hydrolysis                    | A                | A                                     | Thiourea         | [30] |
| Sol-gel                              | A-R              | A                                     | Thiourea         | [32] |
| Hydrothermal                         | A                | A                                     | Thiourea         | [34] |
| Hydrothermal                         | A-R              | A-R with slight increase in R content | Cystine          | [21] |
| Hydrothermal                         | A-R              | A-R with slight increase in R content | Cystine          | [23] |
| Hydrothermal                         | A                | A                                     | Cystine          | [28] |
| Sol-gel                              | A-B-R            | A                                     | Cystine          | [33] |
| Sol-gel                              | A-R              | A                                     | Cystine          | [35] |

Note: A-Anatase; B-Brookite; R-Rutile

Table S2 Doping modes of Carbon, Nitrogen and Sulfur occupying cationic and anionic sites in titania.

| Ti <sup>4+</sup> lattice sites | O <sup>2-</sup> lattice sites   | Ref.             |
|--------------------------------|---------------------------------|------------------|
|                                | C, N, S                         | [18, 29]         |
| C, S                           | N                               | [17]             |
| C, S                           | N <sub>i</sub> + N <sub>s</sub> | [16, 20, 23, 28] |
| C, S                           | N <sub>i</sub>                  | [27, 34]         |
| C                              | N, S                            | [19]             |
| S                              | N                               | [26, 30]         |
| S                              | C                               | [32]             |
| S                              | N <sub>i</sub> + N <sub>s</sub> | [21, 33, 35]     |
| S                              | N <sub>i</sub>                  | [22]             |
|                                | N, S                            | [24]             |
|                                | S                               | [25, 31]         |

Note: N<sub>i</sub>- Interstitial nitrogen doping; N<sub>s</sub>-Substitutional nitrogen doping. The surface segregation of dopant species (without doping) is not considered.

Table S3

Various surface states originated from carbon doping with different precursors

| Thiourea | Cysteine | Cystine |
|----------|----------|---------|
| Ti-C     | Ti-C     |         |
| Ti-O-C   |          | Ti-O-C  |
| C-O      | C-O      | C-O     |
| C=O      | C=O      | C=O     |
| C-OH     | C-OH     |         |
|          |          | C-C     |
|          |          | O-C=O   |

Various surface states arised from nitrogen doping with different precursors

| Thiourea                     | Cysteine                     | Cystine |
|------------------------------|------------------------------|---------|
| O-Ti-N                       | O-Ti-N                       | O-Ti-N  |
| Ti-O-N                       | Ti-O-N                       | Ti-O-N  |
| Ti-N-O                       | Ti-N-O                       |         |
| Ti-N                         | Ti-N                         |         |
| NH <sub>3</sub>              | NH <sub>3</sub>              |         |
| NH <sub>4</sub> <sup>+</sup> | NH <sub>4</sub> <sup>+</sup> |         |
| O-N-Ti                       |                              |         |
| N-Ti-N                       |                              |         |
| C-N                          |                              |         |
| N-H                          |                              |         |
| N-N                          |                              |         |
| N-O                          | N-O                          |         |
|                              | NO <sub>2</sub>              |         |

Various surface states arised from nitrogen doping with different precursors

| Thiourea                      | Cysteine                      | Cystine |
|-------------------------------|-------------------------------|---------|
| Ti-S                          | Ti-S                          |         |
| Ti-O-S (VI)                   |                               | Ti-O-S  |
| SO <sub>4</sub> <sup>2-</sup> | SO <sub>4</sub> <sup>2-</sup> |         |
| Ti-O-S (IV)                   |                               |         |

Note: Surface states coordinated with titanium indicates the doping modes, while rest corresponds to the surface species.
